# Supplementary material
Source: publisher site journal article supplement (https://static.cambridge.org/content/id/urn:cambridge.org:id:article:S0714980823000120/resource/name/S0714980823000120supp001.docx)
Supplement: Supplementary file 1 [file S0714980823000120supp001.docx]

**Appendix. Description of Participating Centres**

|  | **Operation** | **Membership** | **Facilities** | **Fees** | **Transit** | **Participation** |
| --- | --- | --- | --- | --- | --- | --- |
| **Centre A**  (opened 1974)  Municipal  Golden Horseshoe  Population:  40,000 | Mon – Fri:  9 a.m. – 4p.m.  Wed: 6 a.m. – 9p.m.  38 hrs/week  Café:  Mon-Thurs:  8:45 – 1:30 | **Age:** 55+  **Members:** 1200  **Attendance:** ~200/day | - 2 craft studios - 2 fitness studios - 2 activity rooms - Woodshop - Learning centre - Health room - Board room - Grand hall - Kitchen/ Café | **Member Fee:**   - $32/$45 (resident/ non-resident)   **Program Fees:**   - Drop in:  $.50-$5 - Registered: $5-$75 | 120 free parking spots  No public transit  Taxi vouchers $2.50 from town to centre | **Sample size:**  N = 21 (7.1%)  **Data Collection:**  Fall |
| **Centre B**  (2013)  Non-Profit  Eastern  Population: 8,000 | Mon – Fri:  10 a.m. – 3 p.m.  Special events in evenings  25 hrs/week | **Age:** 50+  **Members:** 300  **Attendance:** ~30/day | - 1200 sq. foot facility - Kitchen - Dance floor | **Member Fee:**   - $20   **Program Fees:**   - None - Meals extra  ($4-$8) | 12 free parking spots  Free street parking  No public transit | **Sample Size:**  N = 20 (6.8%)  **Data Collection:** Fall |
| **Centre C**  (1990)  Non-Profit  Greater Toronto Area  (GTA)  Population: 2.8 million | Mon – Fri:  8:30 – 4:30  40 hrs/week | **Age:** 55+  **Members:** 600  **Attendance**: ~75/day | - Large main room - Computer lab - 4 activity rooms | **Member Fee:**   - $0 (in name only)   **Program Fees:**   - Drop in: None - Registered:  $1 - $48 | Limited parking  Frequent public transit  Centre transit for $5/ride (not used) | **Sample Size:**  N = 14 (4.7%)  **Data Collection:** Fall |
| **Centre D**  (2000)  Non-Profit  Central  Population: 12,000 | Mon: 9:00 – 11:00  Wed: 9:00 – 11:00, 12:30 – 3:00   Thurs: 10a.m.-noon  Fri: 9:30 – 1:30  12.5 hours/week | **Age:** 50+  **Members:** 200  **Attendance**: ~10/day | - 2-room schoolhouse on 5 acres of land - Kitchen - Walking trails behind building | **Member Fee:**   - $10   **Program Fees:**   - Access to all programs provided | Free parking  No public transit and too far to walk  Members offer rides when needed | **Sample Size:**  N = 22 (7.5%)  **Data Collection:** Winter |
| **Centre E**  (1975)  Municipal  Central  Population: 90,000 | Mon – Fri:  9:00 – 9:00  Sat (Billiards only): 9:00 – 12:00  63 hours/week | **Age:** 55+  **Members:** 1000  **Attendance**: ~150/day | - Billiard’s lounge - Office - Computer room / board room - Library - Main hall for dances and shuffleboard | **Member Fee:**   - $20   **Program Fees:**   - Drop in: none - Registered: $10 - $85 | 240 free parking spaces  Public transit available, but infrequent | **Sample Size:**  N = 24 (8.1%)  **Data Collection:** Winter |
| **Centre F**  (2010)  Non-Profit  GTA  Population: 2.8 million | Mon-Wed, Fri:  10 a.m. – 4 p.m.  Thurs:  10:00– 5:00  Sat: 10 – 1:00  34 hours/week | **Age:** 55+  **Members:** 400  **Attendance**: ~70/day | - 5 program spaces - Kitchen - Computer lab - Library section - Specialized art equipment (easels, sewing machines) | **Member Fee:**   - $40   **Program Fees:**   - Access to all programs provided - Meals are extra ($3.50) | No centre parking; limited street parking  Centre transit ($6/trip)  Public transit frequent | **Sample Size:**  N = 21 (7.1%)  **Data Collection:** Winter |
| **Centre G**  (1987)  Non-Profit  South-West  Population: 380,000 | Mon – Fri:  7:00 – 3:00  40 hours/week  **Café:**  Mon – Fri:  8:00 – 2:00 | **Age:** 55+  **Members:** 1500  **Attendance**: ~250/day | - 2 pools - Fitness room (equipped) - Craft room - Music room - Board room - Gym - Woodshop - Lounge - Kitchen | **Member Fee:**   - $70-$200 (income test)   **Activity Pass:**   - $35/year, one program/week   **Program Fees:**   - $0.25 - $20 for some | 200 parking spots   - $3 per mo. - $30 per yr.   Centre transit ($3/ride); 3 pick-up & drop-off times  Public transit available | **Sample Size:**  N = 20 (6.8%)  **Data Collection:** Spring |
| **Centre H**  (1987)  Non-Profit  Eastern  Population: 950,000 | Mon – Fri:  8:30 – 3:30  35 hours/week  **Café:**  Mon – Fri  8:30 – 3:30 | **Age:** 50+  **Members:**  550  **Attendance**: ~65/day | - Main Hall - Reception - Lounge - Library - Kitchen   -exercise equipment but no art supplies | **Member Fee:**   - $30   **Program Fees:**   - Drop-in: $1 - Registered: $11 - $100 - Meals extra ($1-$8) | Ample free parking  Public transit available (not main route) | **Sample Size:**  N = 16 (6.4%)  **Data Collection:** Fall (n=10)  Spring (n=6) |
| **Centre I**  (1978)  Non-Profit  Northern  Population: 165,000 | Mon – Thurs:  8:30 – 8:00  Fri-Sat:  8:30 – 4:30  Sun: 10 – 4:30  68.5 hours/week  **Café:** daily | **Age:** 50+  **Members:**  950  **Attendance**: ~300/day | - Multi-purpose + board rooms - Games + hobby rooms - Library - Kitchen & dining area - Outdoor patio - Fully licensed | **Member Fee:**   - $45   **Program Fees:**   - Drop-in: None - Registered: $2-$55 - Meals ($2-$8) | City parking ($.70/hr for 55+, free on evenings and weekends)  Public transit available (frequent) | **Sample Size:**  N = 29 (9.8%)  **Data Collection:** Winter (n=17)  Spring (n=7)  Unknown (n=5) |
| **Centre J**  (2012)  Non-Profit  GTA  Population: 2.8 million | Mon – Fri:  9:00 – 4:00  35 hours/week | **Age:** 55+  **Members:**  100  **Attendance**: ~20/day | - One large room - Kitchen & dining area - Library - Computer lab | **Member Fee:**   - None (in name only)   **Program Fees:**   - None | 6 free parking spots (rarely used)  Public transit available (frequent) | **Sample Size:**  N = 27 (9.2%)  **Data Collection:** Spring |
| **Centre K**  (1965)  Non-Profit Municipal  Central  Population: 50,000 | Mon, Wed, Thurs:  8:30 – 5:00  Tues: 8:30 – 9:00 pm  Fri: 8:30 – 11:30pm  53 hours/week | **Age:** 50+  **Members:**  1600  **Attendance**: ~260/day | - Woodshop - Library - Computer lab - Billiards room - Gym - Bocce court - 4 meeting & 1 multi-purpose rooms - Kitchen - Outdoor terrace | **Member Fee:**   - $25 (residents) - $35 (non-residents)   **Program Fees:**   - $1 activity fee per day - Registered programs $35-$120 | Parking free but share lot  Street parking available  Public Transit available (estimated used by 5%) | **Sample Size:**  N = 31 (10.5%)  **Data Collection:** Spring |
| **Centre L**  (1991)  Municipal  Northern  Population: 111,000 | Mon-Thurs:  8:30 – 9:30pm  Fri: 8:30 – 10pm  Sat: 9 – 4:00  Sun: 12 – 5:00  65 hours/week  **Café:**  Mon – Sat  8:30 – 3:30 | **Age:** 50+  **Members:**  3,000  **Attendance**: ~500/day | - Auditorium - Multi-purpose room - 4 meeting rooms - 2 craft rooms - outdoor patio - Kitchen & dining area | **Member Fee:**   - None   **Program Fees:**   - Drop-on: $2 per activity - Registered: $10-$110 - Meals extra ($4-$7.50) | 100 free parking spots  Use Church parking if lot full  Public transit available | **Sample Size:**  N = 50 (16.9%)  **Data Collection:** Spring |
